# Supplementary material for: Synthesis of material libraries using gas diffusion electrodes
Source: Royal Society of Chemistry journal article supplement (doi:10.1039/d0ta00633e), 2020-01-01
Supplement: d0ta00633e1.pdf [file d0ta00633e1.pdf]

## Synthesis of material libraries using gas diffusion electrodes

Rafael A. Prato M.,<sup>ab</sup> Vincent Van Vught,<sup>a</sup> Kudakwashe Chayambuka,<sup>c</sup> Guillermo Pozo,<sup>ad</sup> Sam Eggermont,<sup>bd</sup> Jan Fransaeer,<sup>bd</sup> and Xochitl Dominguez-Benetton<sup>ad\*</sup>

### Electronic Supplementary Information (ESI)

**Table ESI-1.** Collection of state of the art materials of Co and Mn with similar structures for comparison of the electrocatalytic performance for the oxygen evolution reaction. Within each structural group the performance of the samples synthesized in this work exhibit promising performance.

| Structure    | Catalyst                                                             | Electrolyte    | Substrate  | Mass loading (mg cm <sup>-2</sup> ) | Overpotential @10 (mV) | Tafel slope (mV dec <sup>-1</sup> ) | Ref              |
|--------------|----------------------------------------------------------------------|----------------|------------|-------------------------------------|------------------------|-------------------------------------|------------------|
| <b>BIR</b>   | <b>Na<sub>x</sub>Co<sub>0.25</sub>Mn<sub>0.75</sub>O<sub>2</sub></b> | <b>1 M KOH</b> | <b>GCE</b> | <b>0.15</b>                         | <b>375</b>             | <b>53</b>                           | <b>This work</b> |
| BIR          | Birnessite                                                           | 1 M KOH        | GCE        | 5                                   | 770                    | 243                                 | 1                |
| BIR          | Co <sup>2+</sup> intercalated birnessite                             | 1 M KOH        | GCE        | 0.1-0.22                            | 360-392                | 46-66                               | 1                |
| BIR          | Co-substituted birnessite                                            | 1 M KOH        | GCE        | 3.33                                | 490                    | 82                                  | 1                |
| BIR          | α-MnO <sub>2</sub>                                                   | 1 M KOH        | GCE        | 0.25                                | 516                    | 86                                  | 4                |
| BIR          | MnO <sub>x</sub> layer                                               | 1 M KOH        | FTO        | 0.81                                | 393                    | 84                                  | 6                |
| <b>CSPIN</b> | <b>Mn<sub>1.5</sub>Co<sub>1.5</sub>O<sub>4</sub></b>                 | <b>1 M KOH</b> | <b>GCE</b> | <b>0.15</b>                         | <b>375</b>             | <b>43</b>                           | <b>This work</b> |
| CSPIN        | Co <sub>3</sub> O <sub>4</sub>                                       | 1 M KOH        | GCE        | 2.22                                | 500                    | 76                                  | 1                |
| CSPIN        | MnCo <sub>2</sub> O <sub>4</sub>                                     | 1 M KOH        | GCE        | 0.142                               | 418                    | 84                                  | 2                |
| <b>TSPIN</b> | <b>Mn<sub>3</sub>O<sub>4</sub></b>                                   | <b>1 M KOH</b> | <b>GCE</b> | <b>0.15</b>                         | <b>410</b>             | <b>46</b>                           | <b>This work</b> |
| Amorphous    | Cs-MnO <sub>x</sub>                                                  | 1 M KOH        | GCE        | 0.2                                 | 420                    | 69                                  | 7                |
| <b>LDH</b>   |                                                                      | <b>1 M KOH</b> | <b>GCE</b> | <b>0.15</b>                         | <b>355</b>             | <b>47</b>                           | <b>This work</b> |
| LDH          | CoMn                                                                 | 1 M KOH        | GCE        | 0.142                               | 324                    | 43                                  | 2                |
| LDH          | CoCo - bulk                                                          | 1 M KOH        | GCE        | 0.07                                | 393                    | 59                                  | 3                |
| LDH          | CoCo - NS                                                            | 1 M KOH        | GCE        | 0.07                                | 353                    | 45                                  | 3                |
| LDH          | α-Co(OH) <sub>2</sub>                                                | 1 M KOH        | GCE        | 0.065                               | 380                    | 72                                  | 5                |
| LDH          | SL-β- Co(OH) <sub>2</sub>                                            | 1 M KOH        | GCE        | 0.065                               | 350                    | 57                                  | 5                |

- (1) Thenuwara, A. C., Shumlas, S. L., Attanayake, N. H., Aulin, Y. V., McKendry, I. G., Qiao, Q., ... & Strongin, D. R. (2016). Intercalation of cobalt into the interlayer of birnessite improves oxygen evolution catalysis. *ACS Catalysis*, 6(11), 7739-7743.
- (2) Song, F., & Hu, X. (2014). Ultrathin cobalt-manganese layered double hydroxide is an efficient oxygen evolution catalyst. *Journal of the American Chemical Society*, 136(47), 16481-16484.
- (3) Song, F., & Hu, X. (2014). Exfoliation of layered double hydroxides for enhanced oxygen evolution catalysis. *Nature communications*, 5(1), 1-9.
- (4) West, P. J., Byles, B. W., & Pomerantseva, E. (2019). Creation of controllable cationic and anionic defects in tunnel manganese oxide nanowires for enhanced oxygen evolution reaction. *Polyhedron*, 171, 32-40.
- (5) Jash, P., Srivastava, P., & Paul, A. (2019). Selective synthesis of single layer translucent cobalt hydroxide for the efficient oxygen evolution reaction. *Chemical communications*, 55(15), 2230-2233.
- (6) Walter, C., Menezes, P. W., Loos, S., Dau, H., & Driess, M. (2018). Facile Formation of Nanostructured Manganese Oxide Films as High-Performance Catalysts for the Oxygen Evolution Reaction. *ChemSusChem*, 11(15), 2554-2561.
- (7) Mosa, I. M., Biswas, S., El-Sawy, A. M., Botu, V., Guild, C., Song, W., ... & Suib, S. L. (2016). Tunable mesoporous manganese oxide for high performance oxygen reduction and evolution reactions. *Journal of Materials Chemistry A*, 4(2), 620-631.
